# Supplementary material
Source: PubMed Central journal article supplement (PMC3876199)
Supplement: 1316773110_pnas.201316773SI.pdf [file 1316773110_pnas.201316773SI.pdf]

# Supporting Information

Ågren et al. 10.1073/pnas.1316773110

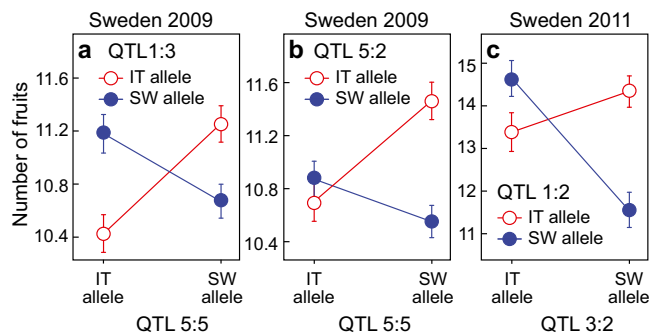

**Fig. S1.** Interaction plots for the three detected epistatic interactions among fitness quantitative trait loci (QTL). Two epistatic interactions were detected in the 2009 experiment in Sweden (A and B) and one in the 2011 experiment in Sweden (C).

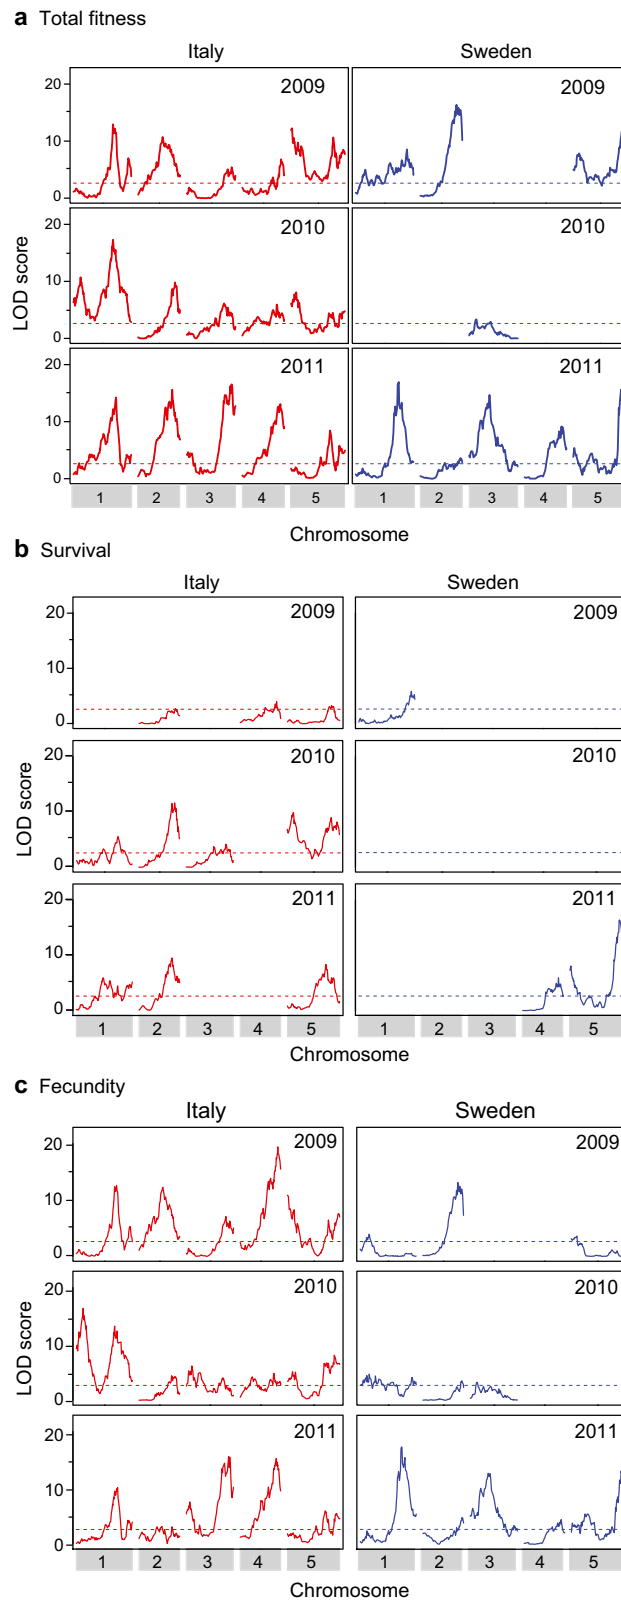

**Fig. S2.** Logarithm of the odds (LOD) profiles from multiple-QTL models of total fitness, survival, and fecundity in the 2009, 2010, and 2011 experiments conducted in Italy and Sweden. (A) Total fitness (quantile-normalized). (B) Survival (quantile-normalized). (C) Fecundity (quantile-normalized).
